# Supplementary material
Source: Springer Nature journal article supplement (https://www.springermedizin.de/resource/supplementary/13054_2012_648_MOESM5_ESM.pdf/9708942)

CD4

CD8

septic

control

septic

control

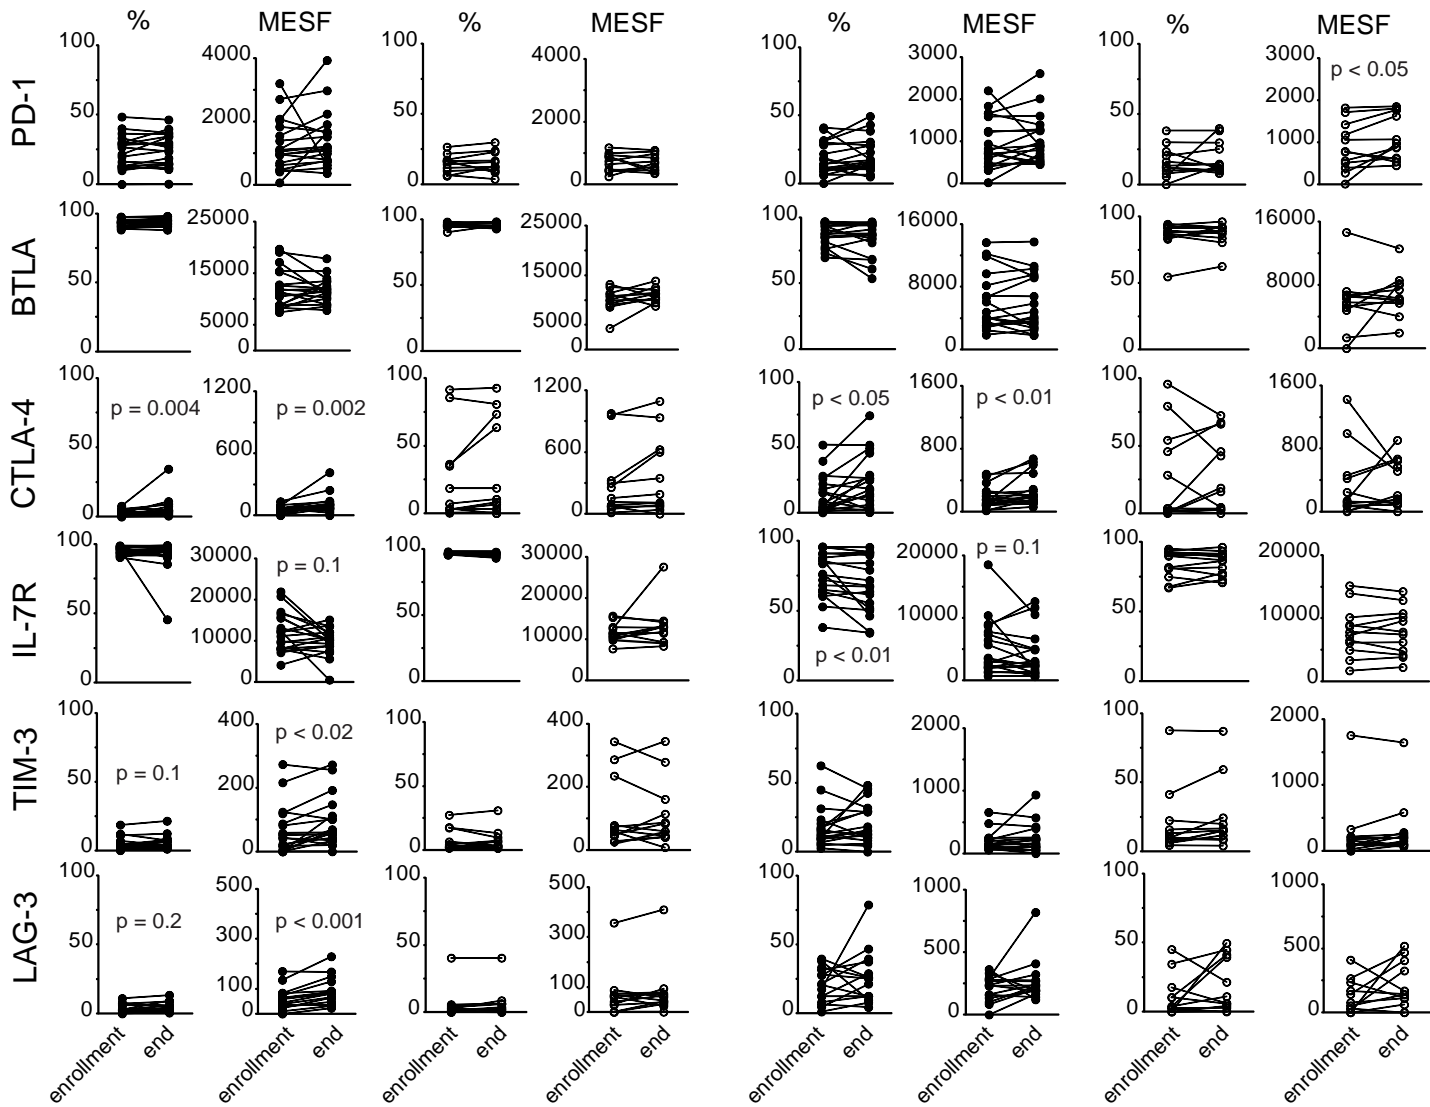

Supplement: MOESM5 [file 9708942]
